# Supplementary material for: Preparation of tea polyphenol-modified copper nanoclusters to promote the proliferation of MC3T3-E1 in high glucose microenvironment
Source: Royal Society of Chemistry journal article supplement (doi:10.1039/c8nj06002a), 2019-01-01
Supplement: c8nj06002a1.pdf [file c8nj06002a1.pdf]

## Supporting Information

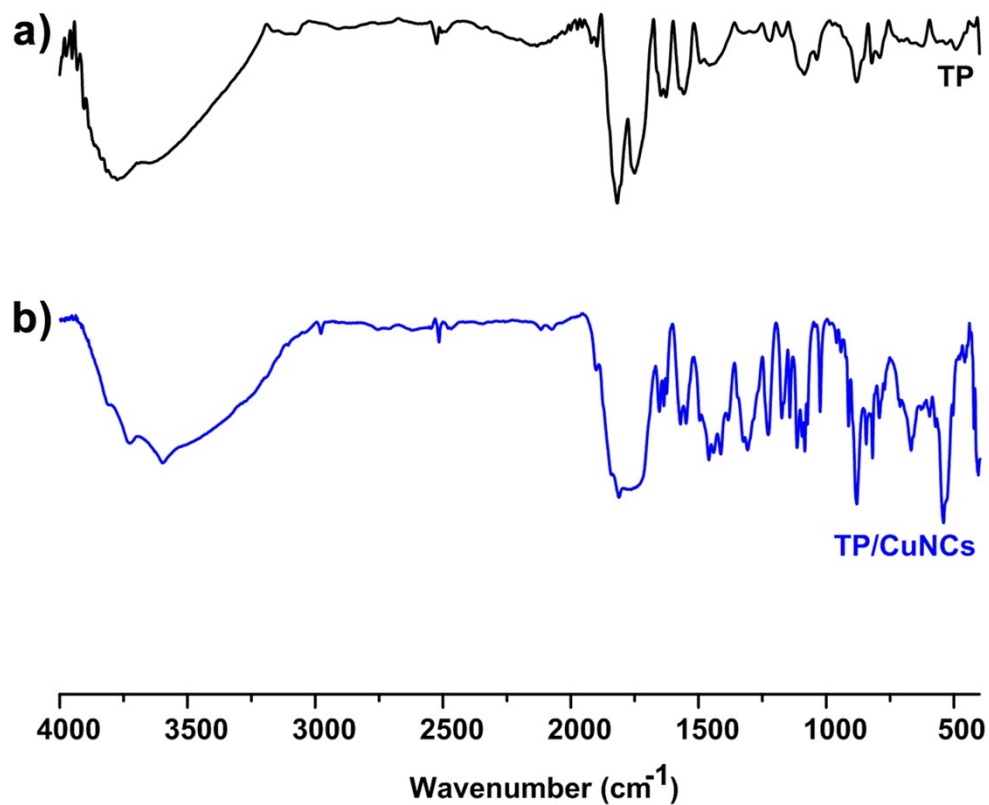

**Figure S1** FTIR Spectra of TP and TP/Cu NCs.

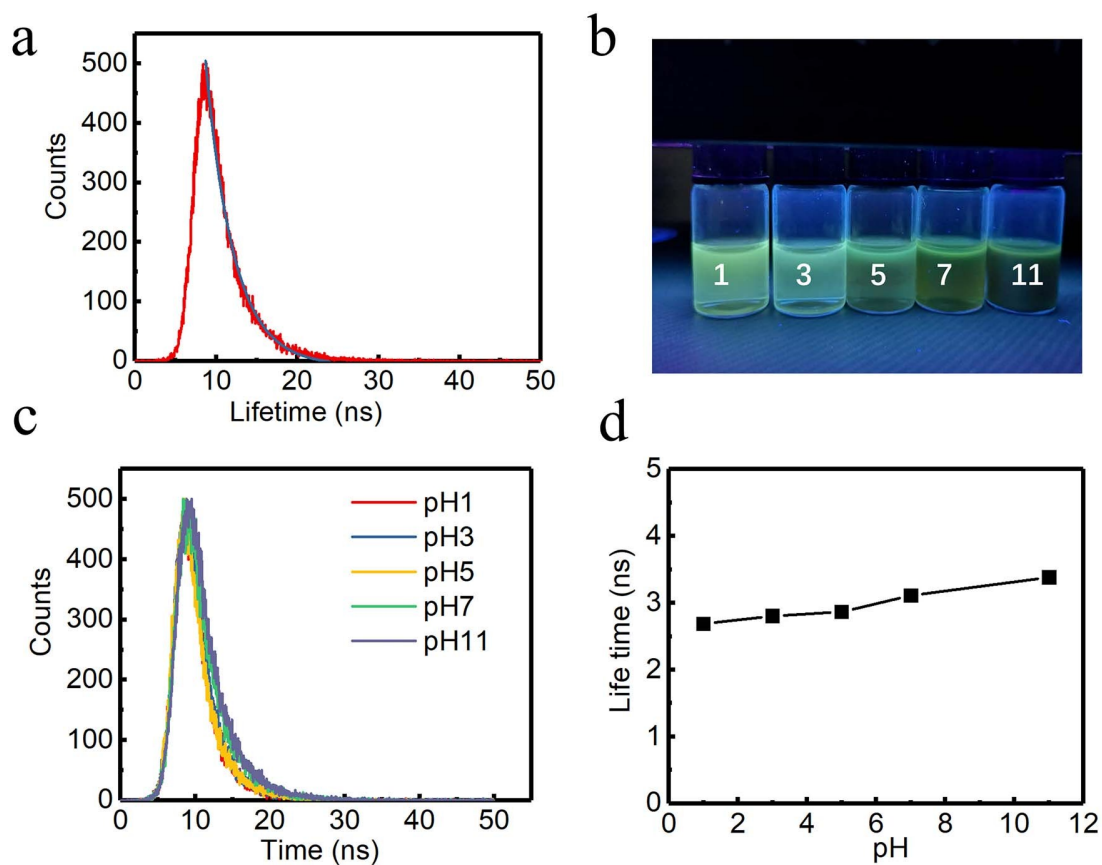

**Figure S2** (a) Fluorescence profile of CuNCs at physiological pH; (b) the photos of CuNCs at different pH values; (c) Fluorescence decays of CuNCs at different pH values; and (d) the corresponding average lifetime for CuNCs as a function of pH values.

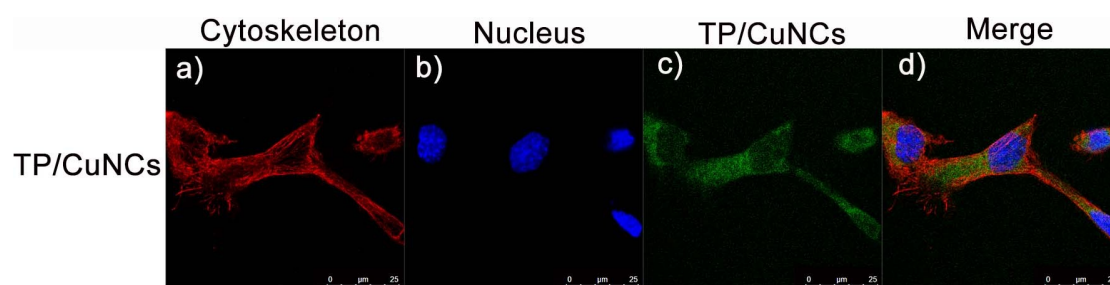

**Figure S3** MC3T3-E1 cells were co-cultured with TP/Cu NCs for 24 hours and then stained with fluorescence. a)the cytoskeleton was stained red by tubulin, b)the nuclei were stained blue by Hoechst 33258, c)TP/CuNCs, d)the images in the right column are merged images from the nucleus, cytoskeleton and TP/CuNCs. The scale bars are all 25  $\mu\text{m}$ .

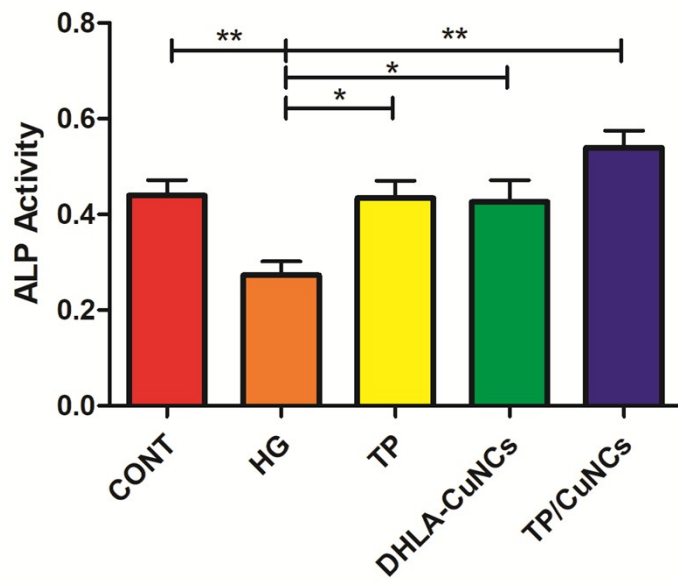

**Figure S4** ALP activity of cells in each group was detected by ALP.
